# Supplementary material
Source: HighWire-hosted journal article supplement (https://gpsych.bmj.com/content/32/4/e100040)
Supplement: inline-supplementary-material-1 [file inline-supplementary-material-1.pdf]

Supplementary material

(A)

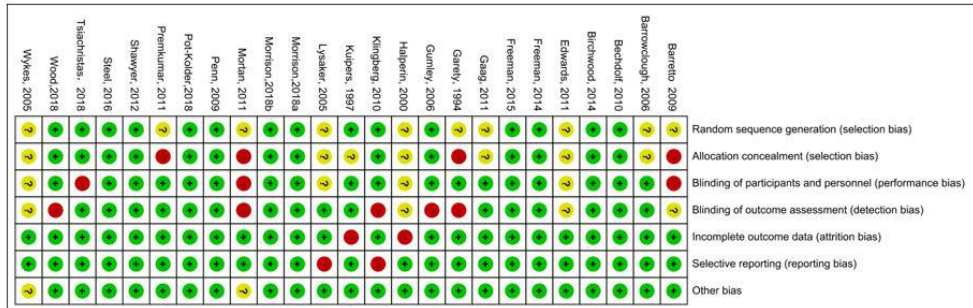

(B)

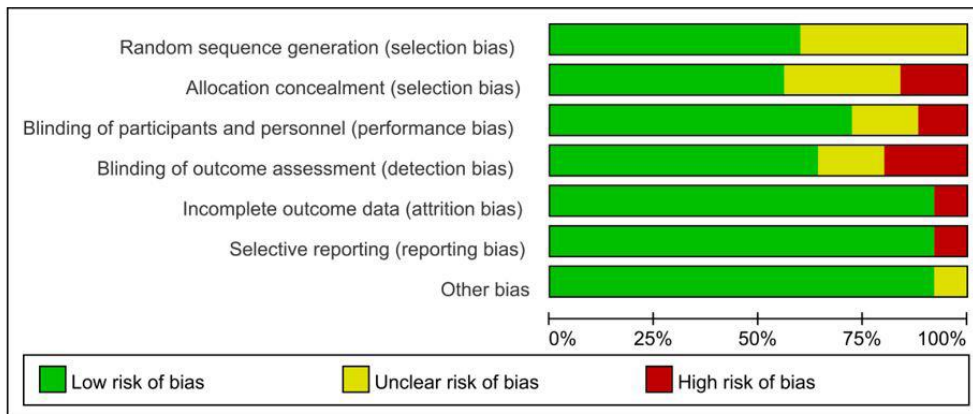

Risk of bias assessment of included studies. (A) Risk of bias summary: risk of bias item for each included study; (B) Risk of bias graph: each risk of bias item presented as percentages across all included studies.

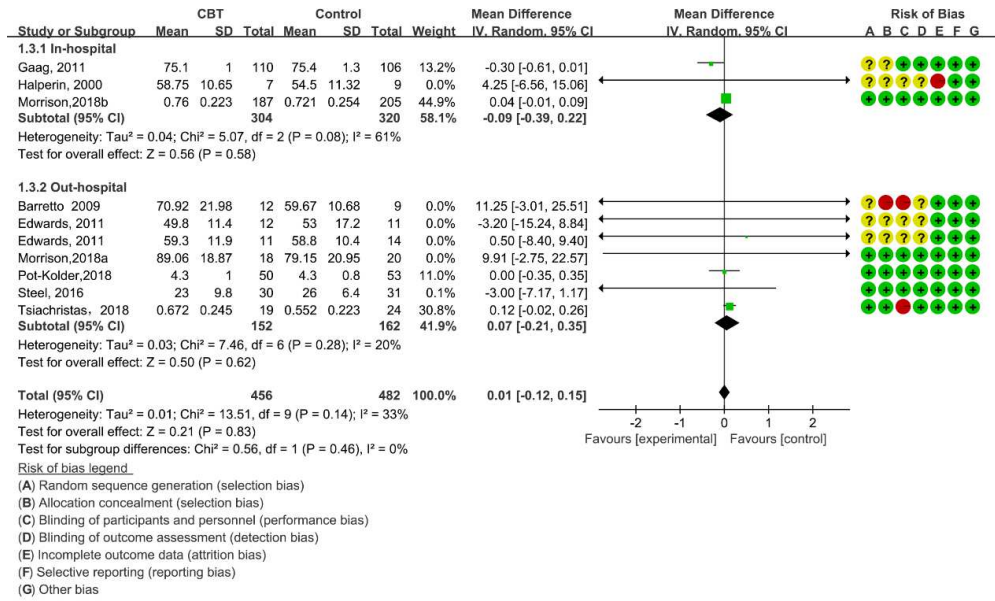

Subgroup analysis of CBT on QoL for in-patients and out-patients.
